# Supplementary material for: Highly multiplexed single-cell in situ RNA and DNA analysis with bioorthogonal cleavable fluorescent oligonucleotides
Source: Chem Sci. 2018 Feb 13;9(11):2909–17. doi: 10.1039/c7sc05089e (PMC5914540; doi:10.1039/c7sc05089e)
Supplement: Supplementary file 2 [file SC-009-C7SC05089E-s002.xlsx]

## Sheet: Sheet1
RNA FISH		DNA FISH
Predecoding probes	5'->3'	Predecoding probes	5'->3'
GAPDH	tcatccgatatggtgatccattttttcatccgatatggtgatccattttttaacggctgcccattcattt	4p16.1	tcatccgatatggtgatccattttttctgttccttgctccttgctttctccatactc
	tcatccgatatggtgatccattttttcatccgatatggtgatccatttttggagaaatcgggccagctag		tcatccgatatggtgatccatttttcttgaacaccttttccaactcaccgtgctggt
	tcatccgatatggtgatccattttttcatccgatatggtgatccattttttctaggaaaagcatcacccg		tcatccgatatggtgatccatttttggcattctcttcaaacctccaggtattgtgta
	tcatccgatatggtgatccattttttcatccgatatggtgatccatttttcccaatacgaccaaatcaga		tcatccgatatggtgatccatttttgttacagcataagatagaccgtaaaagccaac
	tcatccgatatggtgatccattttttcatccgatatggtgatccatttttcagagttaaaagcagccctg		tcatccgatatggtgatccatttttcccagaagtcattgctaaagcaggaaggccca
	tcatccgatatggtgatccattttttcatccgatatggtgatccatttttgggtcattgatggcaacaat		tcatccgatatggtgatccatttttatgatggcaatcctggatgagtgttttagtct
	tcatccgatatggtgatccattttttcatccgatatggtgatccatttttaccatgtagttgaggtcaat		tcatccgatatggtgatccattttttctgccattagctgtgggtcgatcgtgtccta
	tcatccgatatggtgatccattttttcatccgatatggtgatccatttttcatgggtggaatcatattgg		tcatccgatatggtgatccattttttagtgtcccagatagcagagaggctagtgtga
	tcatccgatatggtgatccattttttcatccgatatggtgatccatttttttgacggtgccatggaattt		tcatccgatatggtgatccatttttactgagtgtgagtttccagcccagggtgctgg
	tcatccgatatggtgatccattttttcatccgatatggtgatccatttttcattgatgacaagcttcccg		tcatccgatatggtgatccatttttctcaagagccctattcatgggagtggactctt
	tcatccgatatggtgatccattttttcatccgatatggtgatccatttttctggaagatggtgatgggat		tcatccgatatggtgatccatttttctgcagagcccaagataagagatggccctgag
	tcatccgatatggtgatccattttttcatccgatatggtgatccatttttcttgattttggagggatctc		tcatccgatatggtgatccatttttgtcatactgtgcctaatgaatcactggatata
	tcatccgatatggtgatccattttttcatccgatatggtgatccatttttcagtggactccacgacgtac		tcatccgatatggtgatccatttttagctcaacccaggagaaggatttgttcttgga
	tcatccgatatggtgatccattttttcatccgatatggtgatccatttttttctccatggtggtgaagac		tcatccgatatggtgatccattttttttatagggagtcctgactattcttgttctgt
	tcatccgatatggtgatccattttttcatccgatatggtgatccatttttagagatgatgacccttttgg		tcatccgatatggtgatccatttttccttcagtcttcaactcttgatacctgttaat
	tcatccgatatggtgatccattttttcatccgatatggtgatccatttttatgacgaacatgggggcatc		tcatccgatatggtgatccattttttataaacataggcatgctcaagttaagtgcct
	tcatccgatatggtgatccattttttcatccgatatggtgatccatttttgtcatacttctcatggttca		tcatccgatatggtgatccatttttagggttcaaacttggtggtgtccaggtagcta
	tcatccgatatggtgatccattttttcatccgatatggtgatccatttttattgctgatgatcttgaggc		tcatccgatatggtgatccatttttacaaagcacctaattgggaaacacatggctct
	tcatccgatatggtgatccattttttcatccgatatggtgatccatttttctaagcagttggtggtgcag		tcatccgatatggtgatccatttttaatagcttcagaagacagtaatgcagcatgag
	tcatccgatatggtgatccattttttcatccgatatggtgatccatttttagttgtcatggatgaccttg		tcatccgatatggtgatccatttttcttagcacattggttactgaggaccagaaggt
	tcatccgatatggtgatccattttttcatccgatatggtgatccatttttcatgagtccttccacgatac		tcatccgatatggtgatccatttttgcagggaactaatacagtattacctgctttga
	tcatccgatatggtgatccattttttcatccgatatggtgatccatttttcagtgatggcatggactgtg		tcatccgatatggtgatccattttttcttaatgcaggaagttgtacaaatgcctcca
	tcatccgatatggtgatccattttttcatccgatatggtgatccattttttagaggcagggatgatgttc		tcatccgatatggtgatccatttttgtgctgtaacctctcaccatgtttaaggttgc
	tcatccgatatggtgatccattttttcatccgatatggtgatccattttttcagctcagggatgaccttg		tcatccgatatggtgatccattttttcatatttgacctgaatcttagaacctagcca
	tcatccgatatggtgatccattttttcatccgatatggtgatccatttttcactgacacgttggcagtgg		tcatccgatatggtgatccattttttcaaaccaatcataggaaagcagcagtgcagt
	tcatccgatatggtgatccattttttcatccgatatggtgatccatttttttggcaggtttttctagacg		tcatccgatatggtgatccatttttcattaggtggctgagtccaaaatgtcctcatc
	tcatccgatatggtgatccattttttcatccgatatggtgatccatttttcaccttcttgatgtcatcat		tcatccgatatggtgatccatttttaggaagtatgtatgttgggagcttctgggctc
	tcatccgatatggtgatccattttttcatccgatatggtgatccatttttgctgttgaagtcagaggaga		tcatccgatatggtgatccatttttccaggacagctgtgccagaactgccctgtgtg
	tcatccgatatggtgatccattttttcatccgatatggtgatccatttttcgtcaaaggtggaggagtgg		tcatccgatatggtgatccatttttggtgtcattatgtgtcggttttctcaactata
	tcatccgatatggtgatccattttttcatccgatatggtgatccatttttaaagtggtcgttgagggcaa		tcatccgatatggtgatccatttttggattgtccatattatcatccatctgttaggt
	tcatccgatatggtgatccattttttcatccgatatggtgatccatttttgtcataccaggaaatgagct		tcatccgatatggtgatccatttttgggtttcaaatgattcacaagttttccagtca
	tcatccgatatggtgatccattttttcatccgatatggtgatccattttttgttgctgtagccaaattcg		tcatccgatatggtgatccattttttgttagcatgaggaatcagatacaaggtttga
	tcatccgatatggtgatccattttttcatccgatatggtgatccatttttcagtgagggtctctctcttc		tcatccgatatggtgatccatttttactgtgtgtaaattacaggagggaccttaaat
	tcatccgatatggtgatccattttttcatccgatatggtgatccatttttaactgtgaggaggggagatt		tcatccgatatggtgatccatttttgagagctggtaatacaaggtagccagaggtct
	tcatccgatatggtgatccattttttcatccgatatggtgatccatttttctcttcaaggggtctacatg		tcatccgatatggtgatccatttttcgactagattcaaacatgtttcctttccttgg
	tcatccgatatggtgatccattttttcatccgatatggtgatccatttttatggtacatgacaaggtgcg		tcatccgatatggtgatccatttttagtcacatgtgatactgtgtattagtgatggg
	tcatccgatatggtgatccattttttcatccgatatggtgatccatttttttaactggttgagcacaggg		tcatccgatatggtgatccattttttgactgccctggtgaatgtgagatgtctggac
			tcatccgatatggtgatccatttttgcagctcagagtggcctttgacagcataaagc
			tcatccgatatggtgatccatttttgcgtatgactgacatcacttccatcattttgg
MKI67	gtctttacagatgtctgcggtttttgtctttacagatgtctgcggttttttgcattaccagagactttct		tcatccgatatggtgatccatttttgtggtgtcagtacttctggcagtggctatgtg
	gtctttacagatgtctgcggtttttgtctttacagatgtctgcggtttttggcttataaccaagctttgt		tcatccgatatggtgatccatttttgcttgtgtgcagggatgacttaaaggaagtct
	gtctttacagatgtctgcggtttttgtctttacagatgtctgcggttttttggagttttcctaggactag		tcatccgatatggtgatccatttttgcctgtgactaagatgaaggtaccttcttagc
	gtctttacagatgtctgcggtttttgtctttacagatgtctgcggttttttaggaacctctgtctgagat		tcatccgatatggtgatccattttttgtgggaaacattcctcacctggatcatcctt
	gtctttacagatgtctgcggtttttgtctttacagatgtctgcggtttttagacactctctttgaaggca		tcatccgatatggtgatccatttttcttgagtccaatgcccaacacatcagatctgg
	gtctttacagatgtctgcggtttttgtctttacagatgtctgcggtttttgttcattgacctttgaggac		tcatccgatatggtgatccatttttggctctctccaaatgatagtttgtaagatgtc
	gtctttacagatgtctgcggtttttgtctttacagatgtctgcggtttttcgtggcctgtactaaattga		tcatccgatatggtgatccattttttgctgttagtgtctgcagtgggaaatggtgac
	gtctttacagatgtctgcggtttttgtctttacagatgtctgcggtttttagttgttgagcactctgtag		tcatccgatatggtgatccatttttcaatgttgccctagtgtctatatagaccttgc
	gtctttacagatgtctgcggtttttgtctttacagatgtctgcggttttttctaatacactgccgtctta		tcatccgatatggtgatccatttttgtgtggtaaagggccgggtattgggaagctga
	gtctttacagatgtctgcggtttttgtctttacagatgtctgcggttttttgtttgcagtggatactgtt		tcatccgatatggtgatccatttttctgacttctcagctctgagcaaggcatttcag
	gtctttacagatgtctgcggtttttgtctttacagatgtctgcggtttttgtagcttctgtatattcctg		tcatccgatatggtgatccatttttcctgcagaatctgaaacttgagcatttacctg
	gtctttacagatgtctgcggtttttgtctttacagatgtctgcggtttttcgtgtctttcatgagttctg		tcatccgatatggtgatccatttttatcctcaggtttcaaatgacatacatgatgga
	gtctttacagatgtctgcggtttttgtctttacagatgtctgcggtttttctggttgtaatgactggcag		tcatccgatatggtgatccatttttgccagcttggtcagaaagtttcagcttcatat
	gtctttacagatgtctgcggtttttgtctttacagatgtctgcggttttttcatcagtcattgattcctc		tcatccgatatggtgatccattttttggatgcttcattgtaagaggcctgtcctgtg
	gtctttacagatgtctgcggtttttgtctttacagatgtctgcggttttttttcctgatacttctcttgg		tcatccgatatggtgatccattttttgttcttctagatgtctgtggcactccctgag
	gtctttacagatgtctgcggtttttgtctttacagatgtctgcggtttttctgatggcattagattcctg		tcatccgatatggtgatccatttttaaatgtctacacatcctgtcttccctgaggag
	gtctttacagatgtctgcggtttttgtctttacagatgtctgcggtttttcttcacctactgatggttta		tcatccgatatggtgatccatttttaggtatgtcttgggtcactttacagactggat
	gtctttacagatgtctgcggtttttgtctttacagatgtctgcggtttttctgagacttctcttggactg		tcatccgatatggtgatccatttttcttctccatgatgttcaaatgggagaataaac
	gtctttacagatgtctgcggtttttgtctttacagatgtctgcggttttttcctgagtgcgaagaattct		tcatccgatatggtgatccatttttgaaatctaatttcctcaaggtagctcctaggg
	gtctttacagatgtctgcggtttttgtctttacagatgtctgcggttttttcgttagtcattgattcctc		tcatccgatatggtgatccattttttgctgtcttcactttgaagaattcttgaccac
	gtctttacagatgtctgcggtttttgtctttacagatgtctgcggttttttgtgacttggtgtctggaag		tcatccgatatggtgatccatttttttgtgatacagcttgcaactccacaccctggt
	gtctttacagatgtctgcggtttttgtctttacagatgtctgcggtttttagctctgtaggatactttgg		tcatccgatatggtgatccatttttcaggacattgtactgcaggaattggaatctga
	gtctttacagatgtctgcggtttttgtctttacagatgtctgcggtttttgtgttgatgtctttctcttc		tcatccgatatggtgatccatttttttgtaggttcctctatgtgctgcttttccaga
	gtctttacagatgtctgcggtttttgtctttacagatgtctgcggttttttctattgctgccaggtaaat		tcatccgatatggtgatccatttttgatcttctaatcacctcccagggtctggctgg
	gtctttacagatgtctgcggtttttgtctttacagatgtctgcggttttttttccttacgagtttgtagc		tcatccgatatggtgatccatttttctaatgcacgtgactaatccttagactgctta
	gtctttacagatgtctgcggtttttgtctttacagatgtctgcggttttttggtgtctggaaaagctctc		tcatccgatatggtgatccatttttgatgaccaagtgggattgaacttctgtccggt
	gtctttacagatgtctgcggtttttgtctttacagatgtctgcggttttttgattgcggagatttgcaga		tcatccgatatggtgatccattttttcaatgacttcttagggtacccttgaaggagc
	gtctttacagatgtctgcggtttttgtctttacagatgtctgcggtttttgtgttgatgtctttctcttc		tcatccgatatggtgatccatttttcacagcagtccatattcagttagctctcatat
	gtctttacagatgtctgcggtttttgtctttacagatgtctgcggtttttgtgattttgtcatcggtcat		tcatccgatatggtgatccattttttccatctgtaaactaggatgagtagttttccc
	gtctttacagatgtctgcggtttttgtctttacagatgtctgcggtttttaggatatcttgagtcgttgc		tcatccgatatggtgatccatttttggtttgagctgataagacatagaagtactaca
	gtctttacagatgtctgcggtttttgtctttacagatgtctgcggtttttctggaagagctctttcaagc		tcatccgatatggtgatccatttttaggatgggagcctgagtcaactggttttgtaa
	gtctttacagatgtctgcggtttttgtctttacagatgtctgcggtttttctgagacttctcttggactg		tcatccgatatggtgatccatttttgctacatgctcttgcttccttcattgttcttg
	gtctttacagatgtctgcggtttttgtctttacagatgtctgcggtttttctactgatggtgttcgtttc		tcatccgatatggtgatccatttttagtgcttatgcctttgtggttctcacagcacc
	gtctttacagatgtctgcggtttttgtctttacagatgtctgcggttttttcatcagtcattgattcctc		tcatccgatatggtgatccattttttgagcagttctaaaccaagttcaagttactag
	gtctttacagatgtctgcggtttttgtctttacagatgtctgcggtttttccttaaacgctttgatgctc		tcatccgatatggtgatccatttttccatgagctcagtctctaaggcccggtaacat
	gtctttacagatgtctgcggtttttgtctttacagatgtctgcggtttttgcacgttgcttcaatacttt		tcatccgatatggtgatccatttttgacttgggttaattagccttctagttgaaggt
	gtctttacagatgtctgcggtttttgtctttacagatgtctgcggttttttttgcagattccttcaatgc		tcatccgatatggtgatccatttttggagtctgtagaacacctttcctatggagtct
			tcatccgatatggtgatccatttttttccacggcaccctcctaccaaggctcttgca
			tcatccgatatggtgatccatttttggcagcagcttagaaggccaagacttagctgc
Decoding probes	5'->3'		tcatccgatatggtgatccatttttcttgcagtagtcaagcatgacataccctattt
GAPDH	Quasar 570/Cy5-N3-tggatcaccatatcggatga		tcatccgatatggtgatccatttttagctgtccatgaatttggaagtgatgtccctg
GAPDH cycle1	Quasar 570-N3-tggatcaccatatcggatgatttttggctatgtccgtaacactcctttttggctatgtccgtaacactcc		tcatccgatatggtgatccatttttaagtaccatggatgtgtataggctcctgagtc
GAPDH cycle2	Cy5-N3-gaaccatggtacctgagatctttttgaaccatggtacctgagatctttttggagtgttacggacatagcc		tcatccgatatggtgatccattttttctccttccctctggcacataggtatgttcca
GAPDH cycle3	Quasar 570-N3-gatctcaggtaccatggttc		tcatccgatatggtgatccatttttaatagtgacccaacgagatctcctgtgaaatg
			tcatccgatatggtgatccatttttagaccaggagagttaattaattacctgaggac
			tcatccgatatggtgatccatttttgtatacttctggccttctcaggagtaagcaga
MKI67	Quasar 570/Cy5-N3-ccgcagacatctgtaaagac		tcatccgatatggtgatccatttttaccctcgatgaggaggtttggaaagaatggat
			tcatccgatatggtgatccatttttgttgactctgtacttaatgtcagaagtggtgg
			tcatccgatatggtgatccatttttcaaagataccacctgtcatgcaacatatatgt
			tcatccgatatggtgatccatttttactgtcgtgatgtggaactccaaaaggtgaat
			tcatccgatatggtgatccatttttatgcagaatgtcatcccttccatacttggcag
			tcatccgatatggtgatccatttttttgatttcgttaccttgaaccagtggccaaag
			tcatccgatatggtgatccatttttttgacatttgtgctttaggaccatactaggat
			tcatccgatatggtgatccatttttcattaaacatgagcccttaaagcagcagttgc
			tcatccgatatggtgatccatttttgagcaggttatctttattggcacaaatgttac
			tcatccgatatggtgatccatttttgttgctctaggagaactggagtcctagcccag
			tcatccgatatggtgatccatttttacaggccaaggagttgtgacccattagctttg
			tcatccgatatggtgatccatttttgtgcatggctaagtcattagcttaaccattgc
			tcatccgatatggtgatccatttttgagttcccagcagcaaccacagggagggccag
			tcatccgatatggtgatccatttttttgtcgcatgaacatgccacatctgtccacca
			tcatccgatatggtgatccattttttgagaattgtcttcccagaagggtaggtcctt
		Decoding probes	5'->3'
		4p16.1	Cy5-N3-tggatcaccatatcggatga
